# Supplementary material
Source: publisher figshare collection journal article supplement (https://wiley.figshare.com/articles/dataset/_/3514037)
Supplement: Supplementary file 1 [file 1 › appendix-A.htm]

Ecological Archives A019-005-A1


### *Ecological Archives* A019-005-A1

### **Ricardo M. Holdo, Robert D. Holt, and John M. Fryxell. 2009. Grazers, browsers, and fire influence the extent and spatial pattern of tree cover in the Serengeti. *Ecological Applications* 19:95–109.**

Appendix A. Savanna dynamics model equations and their derivation, including a table of state variables and model parameters. Click here for a PDF file of the appendix.

---


[Back to A019-005]
